# Supplementary material for: A comparison of plume rise algorithms to stack plume measurements in the Athabasca oil sands
Source: Copernicus journal article supplement (doi:10.5194/acp-18-14695-2018), 2018-10-12

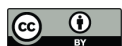

*Supplement of*

## **A comparison of plume rise algorithms to stack plume measurements in the Athabasca oil sands**

**Mark Gordon et al.**

*Correspondence to:* Mark Gordon ([mgordon@yorku.ca](mailto:mgordon@yorku.ca))

The copyright of individual parts of the supplement might differ from the CC BY 4.0 License.

## Supplementary Material for:

### A Comparison of Plume Rise Algorithms to Stack Plume Measurements in the Athabasca Oil Sands

The following 22 figures compare the predicted plume rise from the Briggs parameterization used in GEM-MACH ( $h_B$ ) with the measured plume rise as determined by tower measurements at AMS03 ( $h_M$ ) as described in the text.

Each figure corresponds to a “case” listed in Table 6. The red dots repeat the base case (case 0) in each figure for comparison. The black circles are the comparison results for each case.

For ease of comparison, the  $h_B$  axis scale is not modified in cases where values of  $h_B > 1600$  m occur. Instead the number of values greater than 1600 m are given as well as the maximum  $h_B$  value.

Lines demonstrate 2:1 (dotted), 1:1 (solid), and 1:2 (dashed) ratios for comparison.

Table 6 is reproduced here for comparison. See text for explanation of cases and variables.

| Case                     | #  | $a$<br>[m] | $b$   | $r^2$ | $\overline{h_B}$<br>[m] | $\overline{h_M}$<br>[m] | $\overline{h_B}/\overline{h_M}$ | Ratio<br>< 0.5 | >0.5<br>& <2 | Ratio<br>> 2 | $n$ |
|--------------------------|----|------------|-------|-------|-------------------------|-------------------------|---------------------------------|----------------|--------------|--------------|-----|
| Base Case                | 0  | 105        | 0.14  | 0.02  | 143                     | 265                     | 0.54                            | 55%            | 30%          | 14%          | 83  |
| Suncor 1                 | 1  | 1          | 0.03  | 0.32  | 6                       | 178                     | 0.04                            | 91%            | 0%           | 9%           | 11  |
| Suncor 2                 | 2  | 140        | -0.01 | 0.00  | 137                     | 260                     | 0.52                            | 73%            | 9%           | 18%          | 11  |
| Suncor 3                 | 3  | 8          | 0.00  | 0.00  | 9                       | 199                     | 0.04                            | 92%            | 0%           | 8%           | 12  |
| Suncor 4                 | 4  | 235        | -0.21 | 0.02  | 175                     | 286                     | 0.61                            | 50%            | 33%          | 17%          | 12  |
| Syncrude 1               | 5  | 289        | 0.02  | 0.00  | 294                     | 296                     | 1.00                            | 18%            | 53%          | 29%          | 17  |
| Syncrude 2               | 6  | 149        | 0.12  | 0.04  | 185                     | 298                     | 0.62                            | 25%            | 69%          | 6%           | 16  |
| CNRL 1                   | 7  | 66         | -0.04 | N/A   | 49                      | 395                     | 0.13                            | 100%           | 0%           | 0%           | 2   |
| CNRL 2 (NPRI)            | 8  | 100        | -0.23 | N/A   | 15                      | 374                     | 0.04                            | 100%           | 0%           | 0%           | 2   |
| Neutral Cases Only       | 9  | 101        | 0.13  | 0.01  | 134                     | 244                     | 0.55                            | 56%            | 26%          | 18%          | 50  |
| Stable Cases Only        | 10 | 116        | 0.14  | 0.04  | 157                     | 296                     | 0.53                            | 55%            | 36%          | 9%           | 33  |
| Expanded Neutral Limits  | 11 | 105        | 0.14  | 0.02  | 143                     | 265                     | 0.54                            | 55%            | 30%          | 14%          | 83  |
| Reduced Neutral Limits   | 12 | 94         | 0.16  | 0.03  | 136                     | 265                     | 0.51                            | 55%            | 30%          | 14%          | 83  |
| Stability by Lapse Rate  | 13 | 93         | 0.14  | 0.05  | 129                     | 265                     | 0.49                            | 55%            | 33%          | 12%          | 83  |
| Stability by P-G. Class. | 14 | 140        | 0.24  | 0.02  | 203                     | 265                     | 0.77                            | 48%            | 33%          | 19%          | 83  |
| Incl. $x_e > 50$ km      | 15 | 126        | -0.01 | 0.00  | 123                     | 306                     | 0.40                            | 63%            | 24%          | 13%          | 121 |
| Scaled to Max. Dist.     | 16 | 107        | 0.14  | 0.02  | 145                     | 265                     | 0.55                            | 55%            | 30%          | 14%          | 83  |
| No limit of $-5K/km$     | 17 | 109        | 0.16  | 0.02  | 151                     | 265                     | 0.57                            | 53%            | 31%          | 16%          | 83  |
| Eqns 4b and 5b (no min)  | 18 | 1416       | -1.25 | 0.00  | 1085                    | 265                     | 4.10                            | 54%            | 23%          | 23%          | 83  |
| Alternate Neutral Eq. 16 | 19 | 4422       | -4.26 | 0.00  | 3293                    | 265                     | 12.44                           | 51%            | 23%          | 27%          | 83  |
| Momentum (Eq 17 & 18)    | 20 | 114        | 0.17  | 0.02  | 159                     | 265                     | 0.60                            | 54%            | 30%          | 16%          | 83  |
| Momentum (Eq 20)         | 21 | 227        | 0.40  | 0.02  | 333                     | 265                     | 1.26                            | 48%            | 17%          | 35%          | 83  |

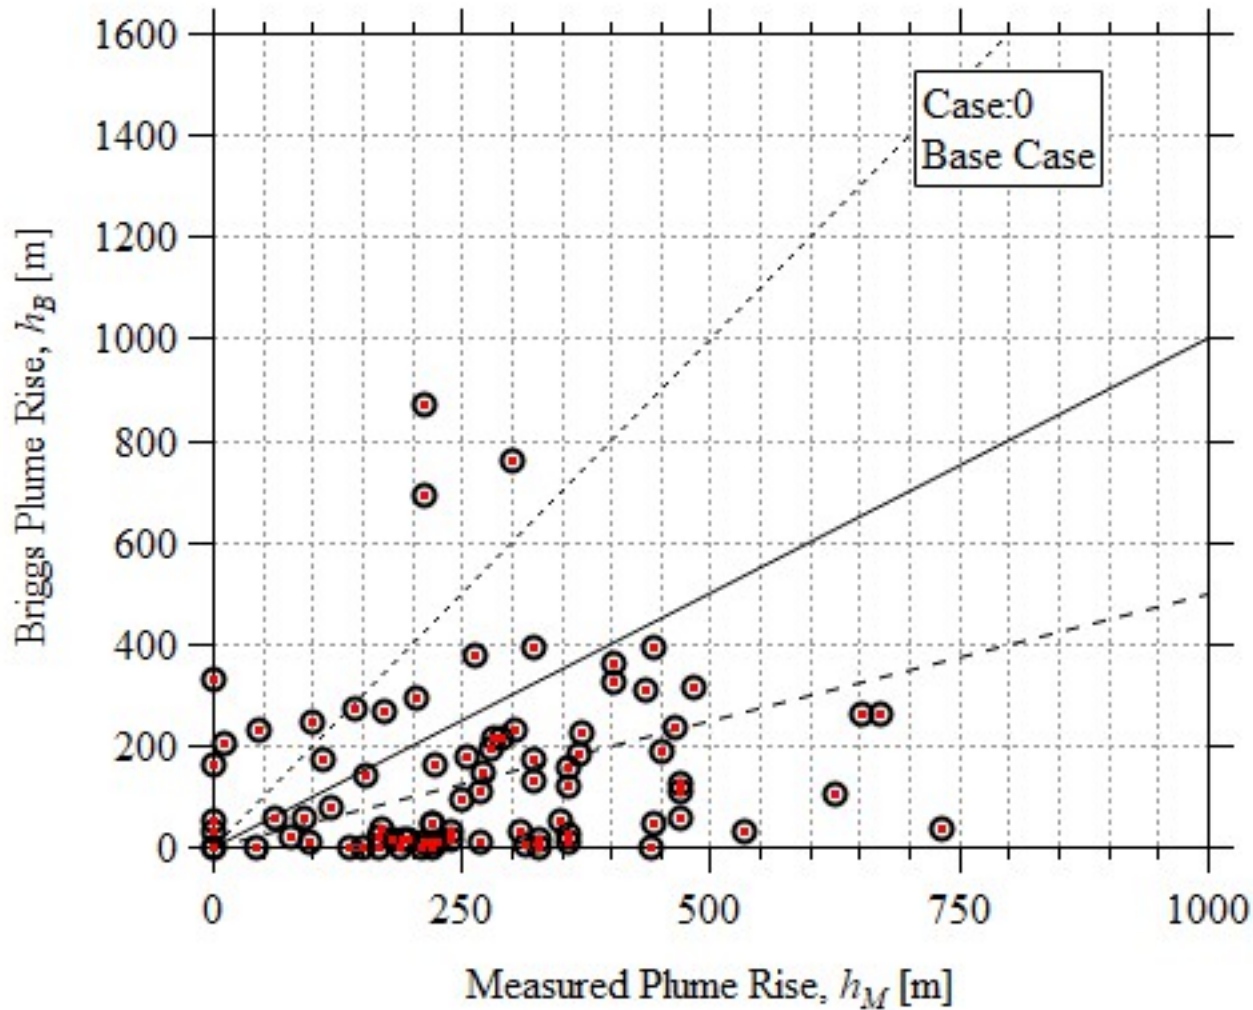

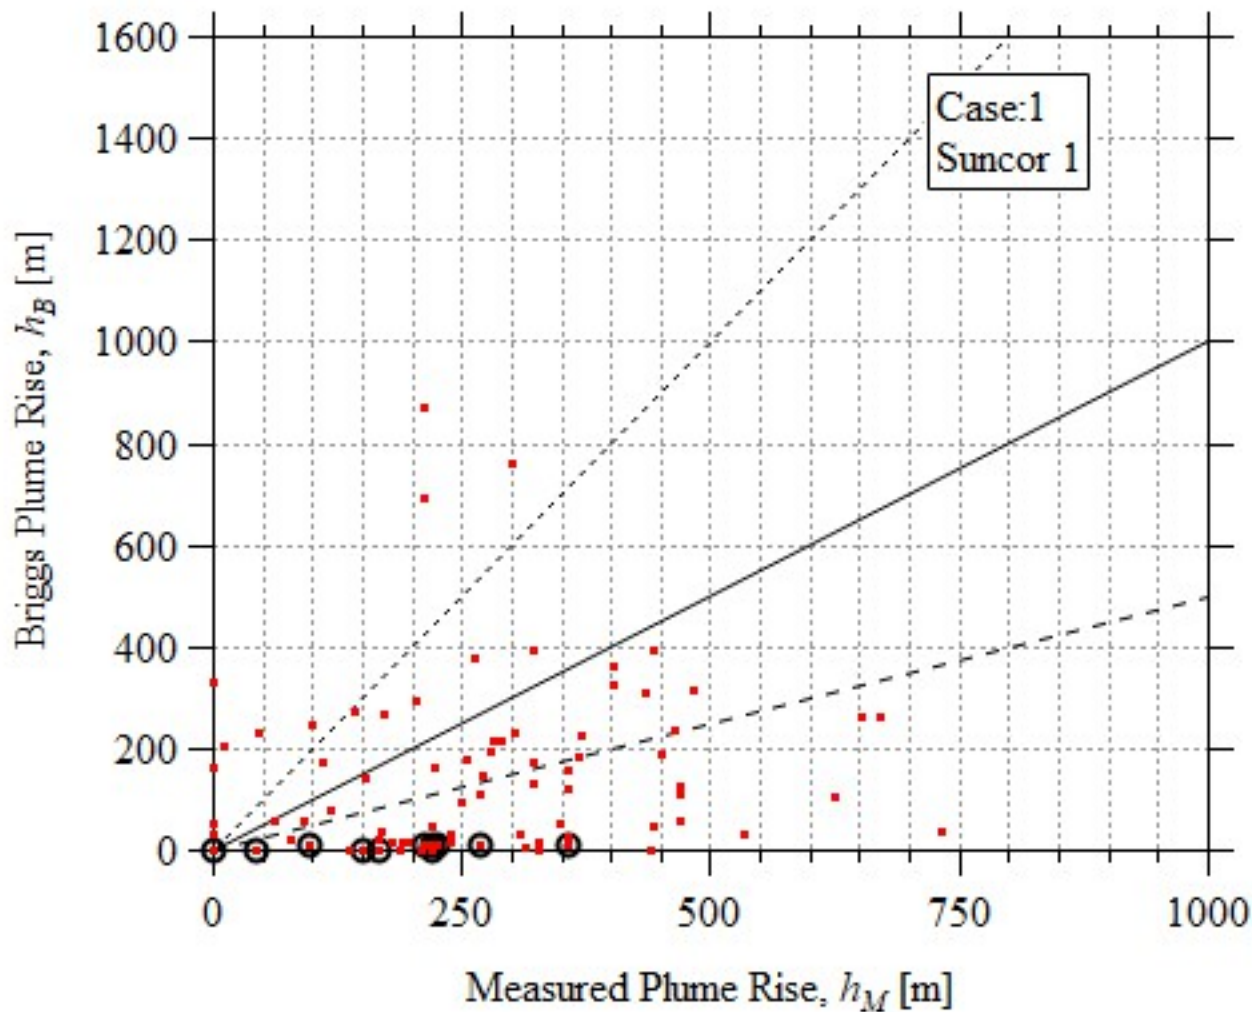

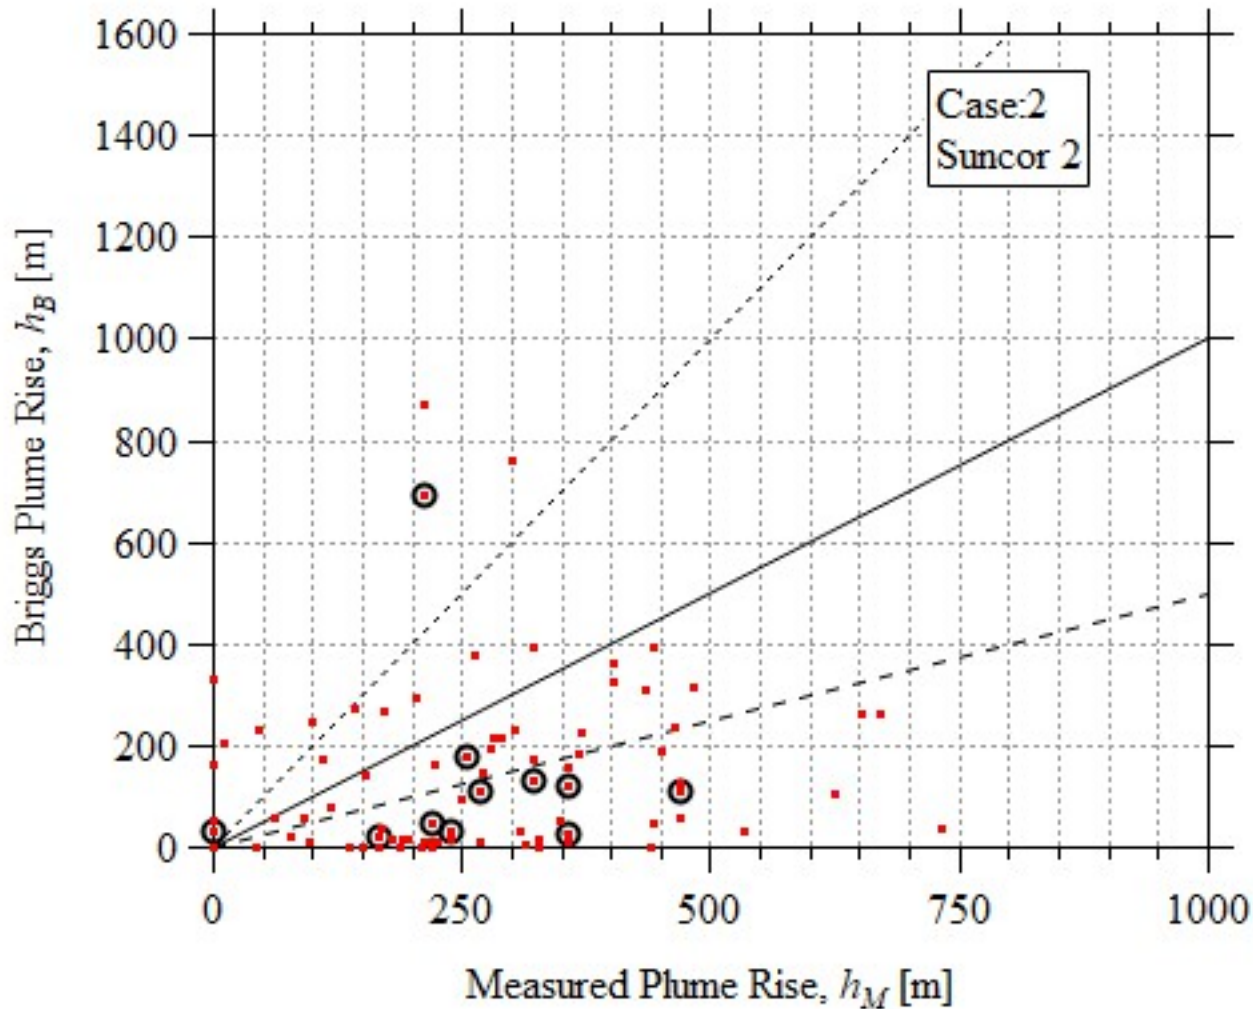

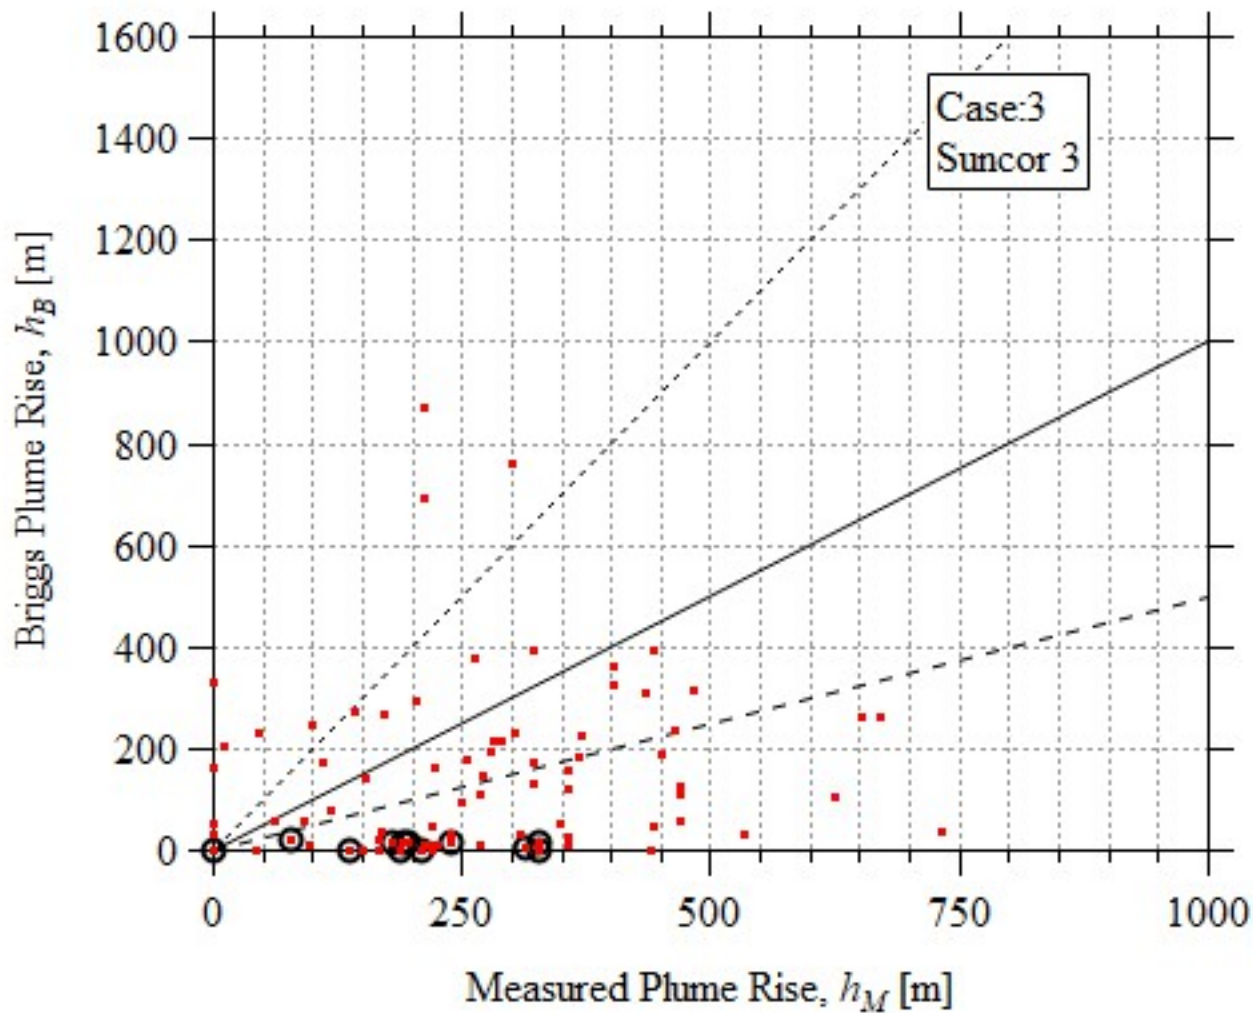

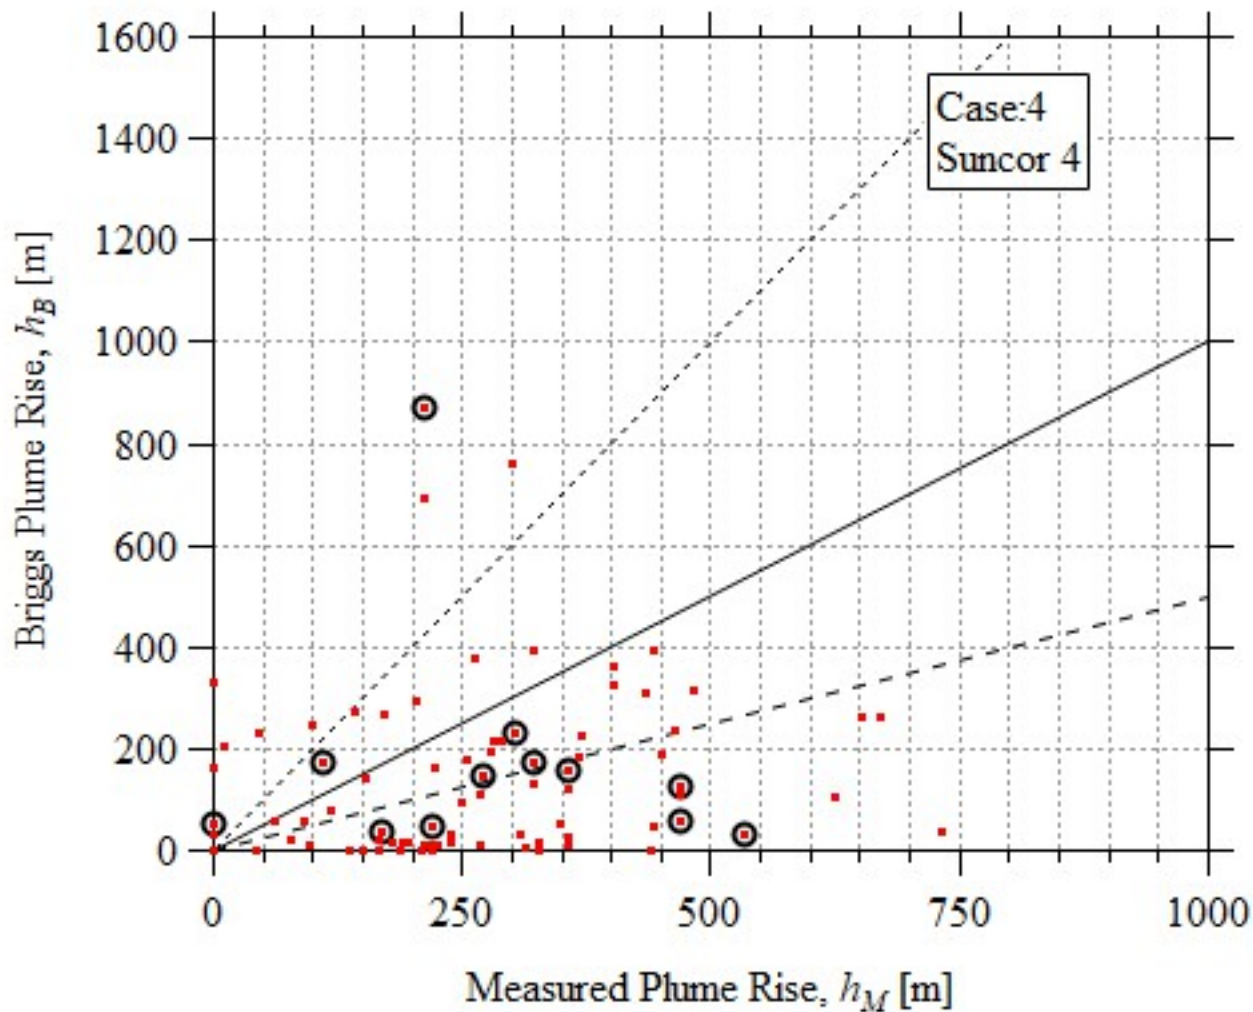



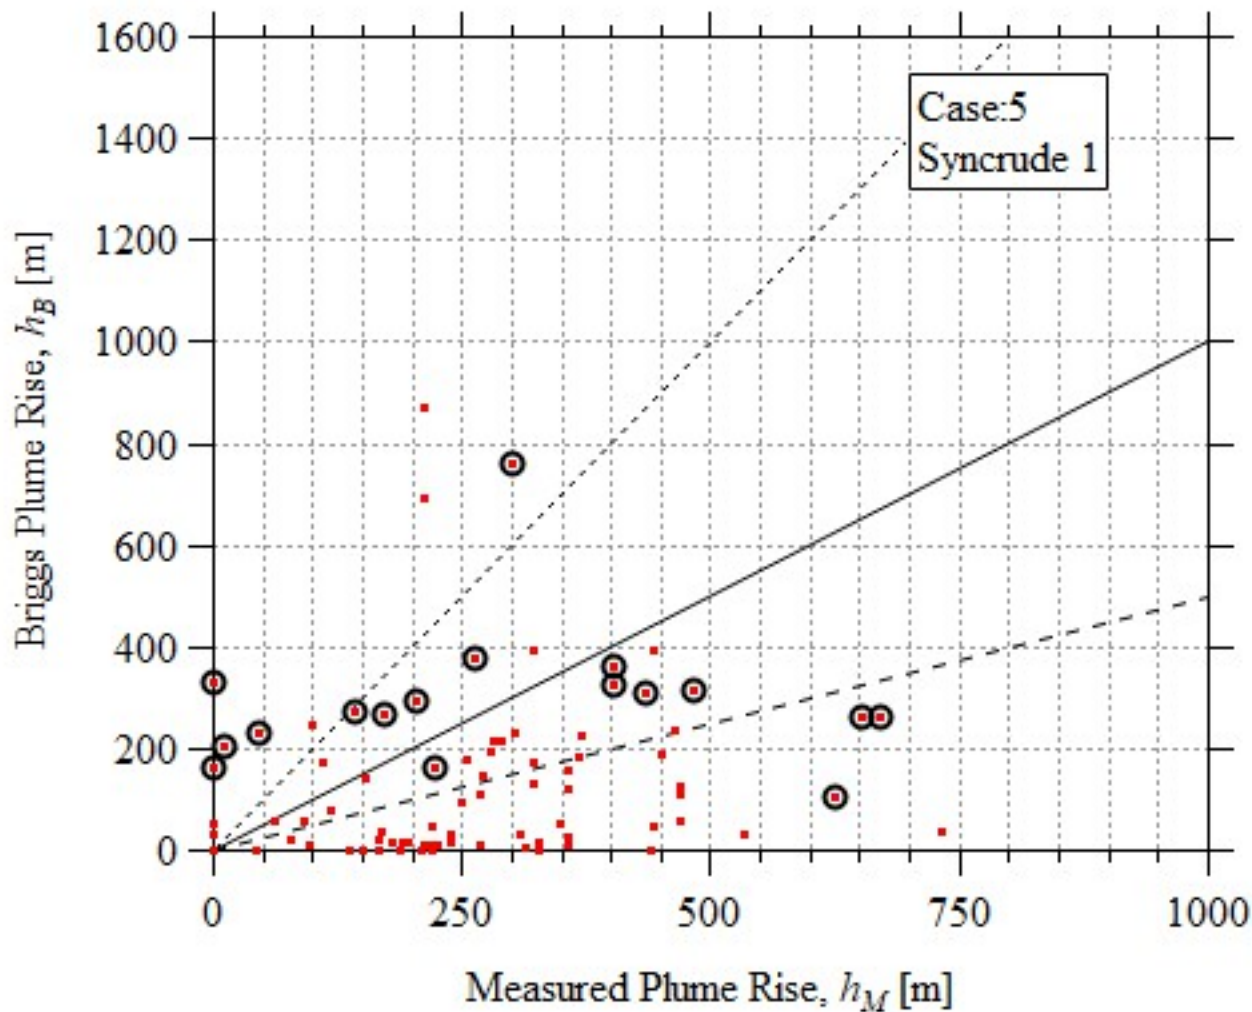



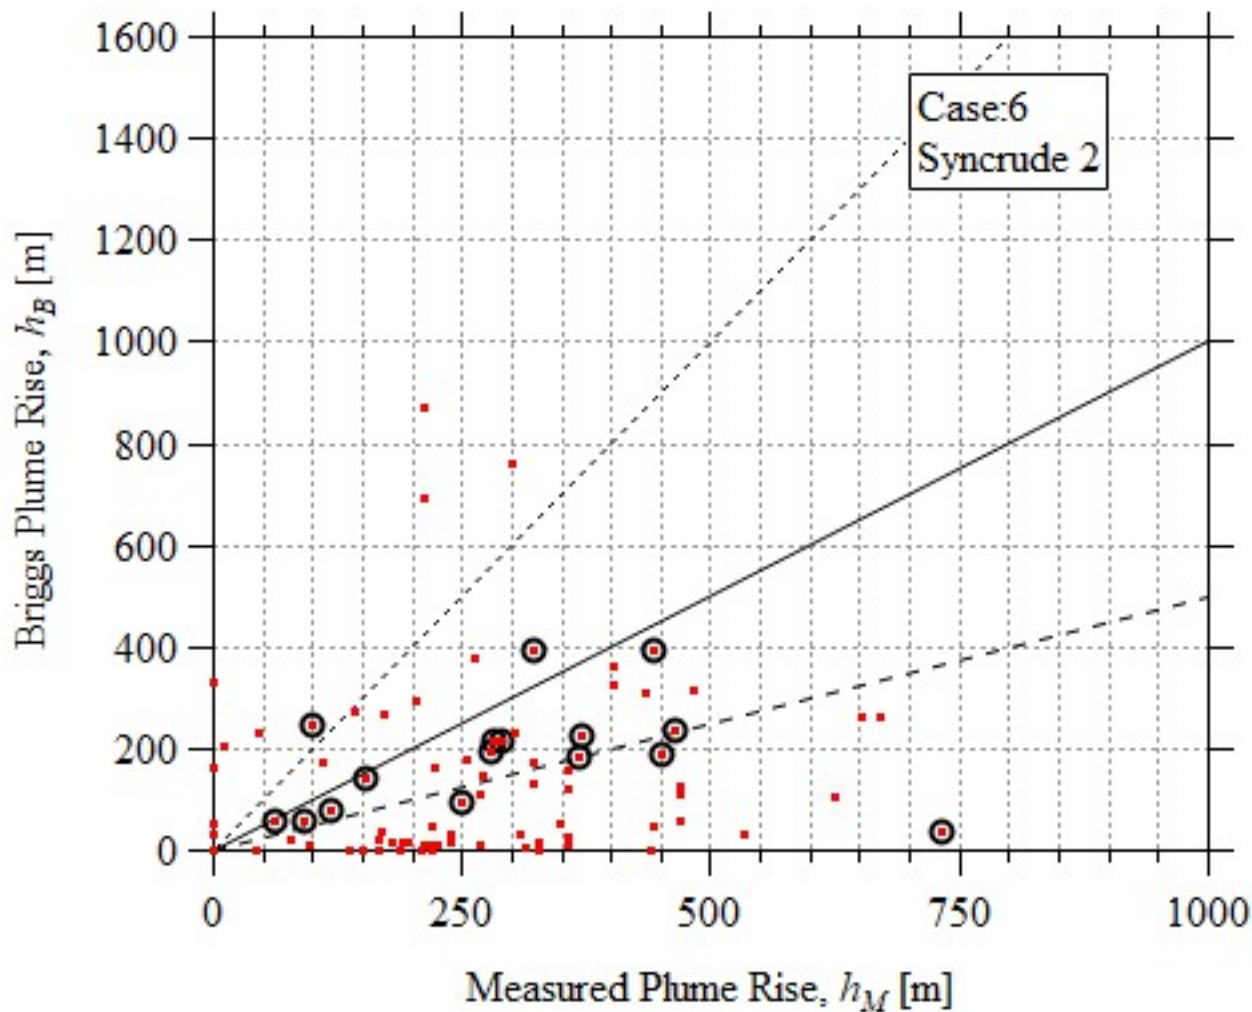

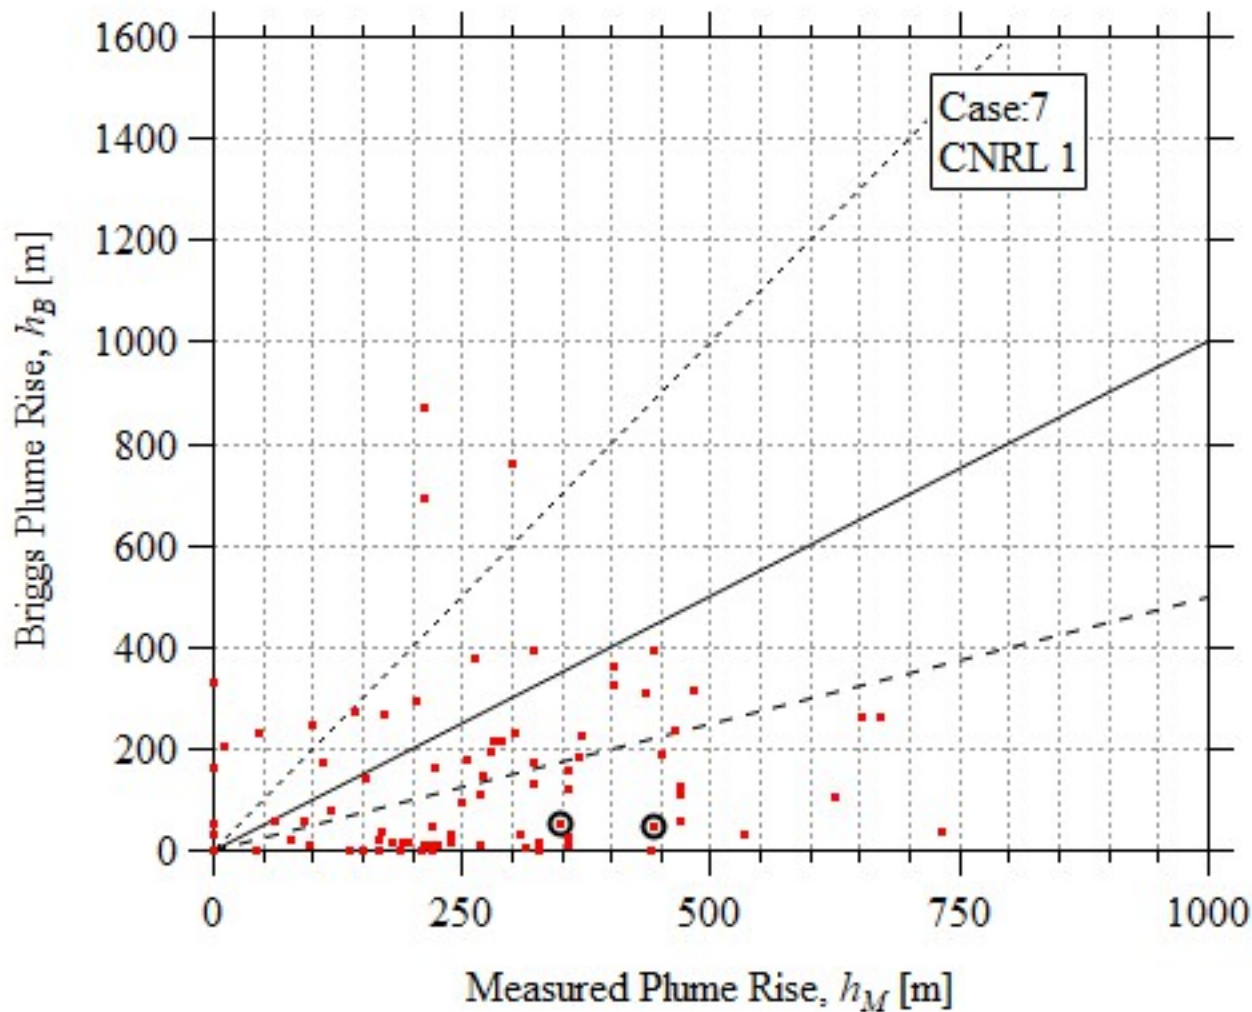

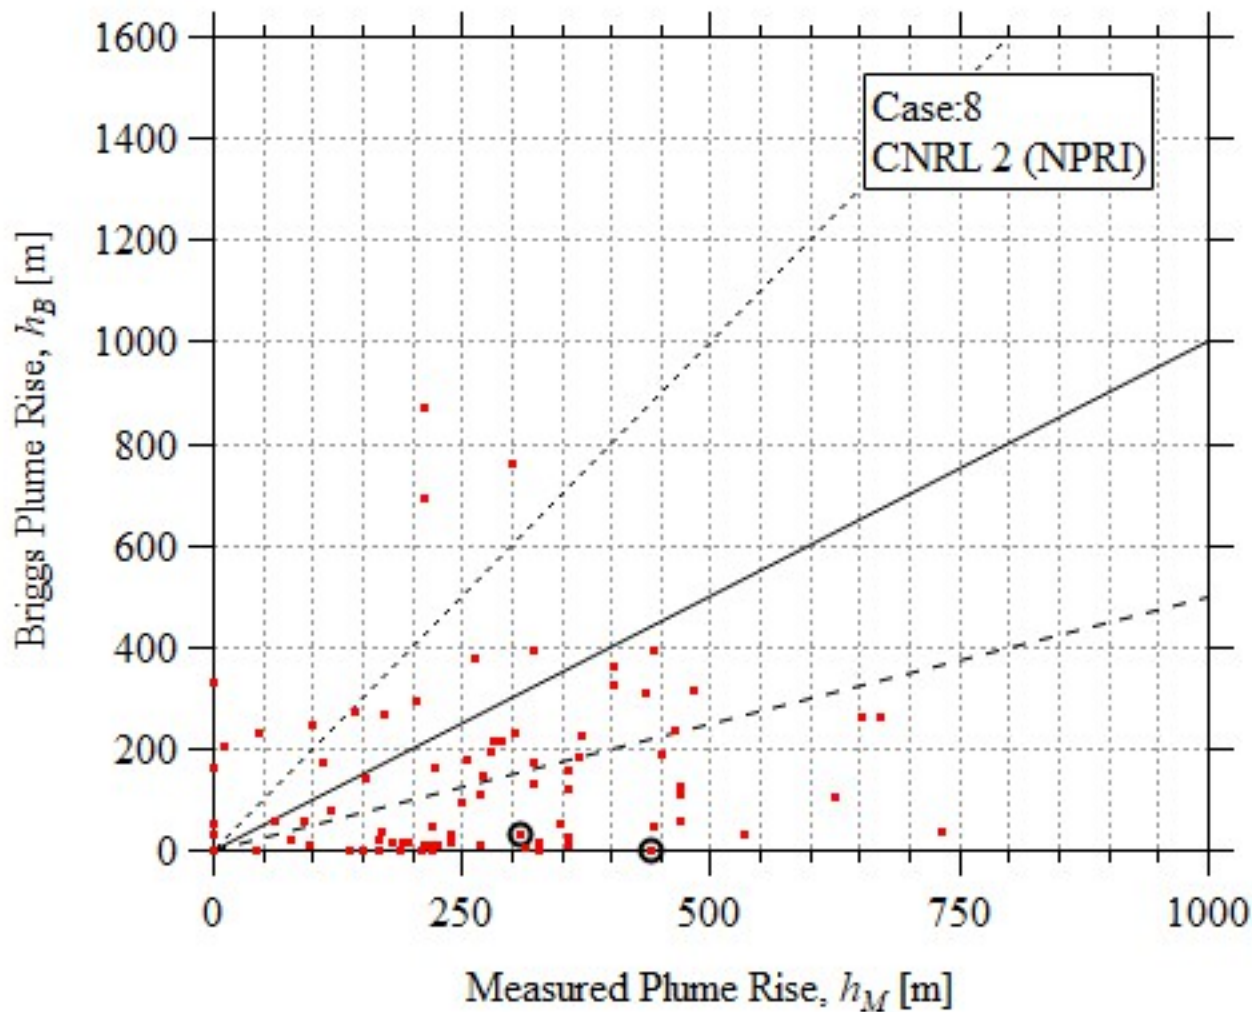

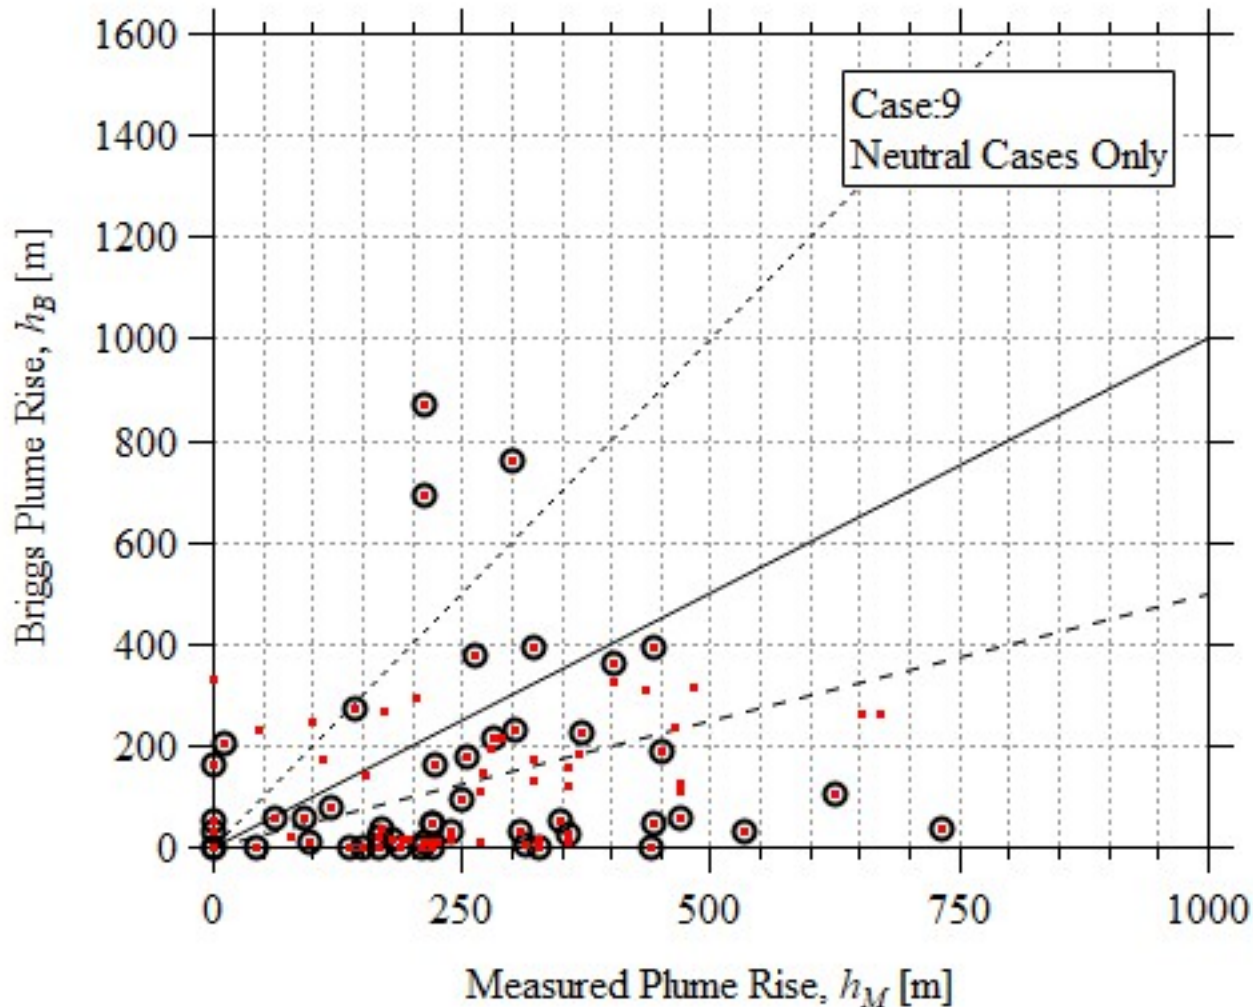

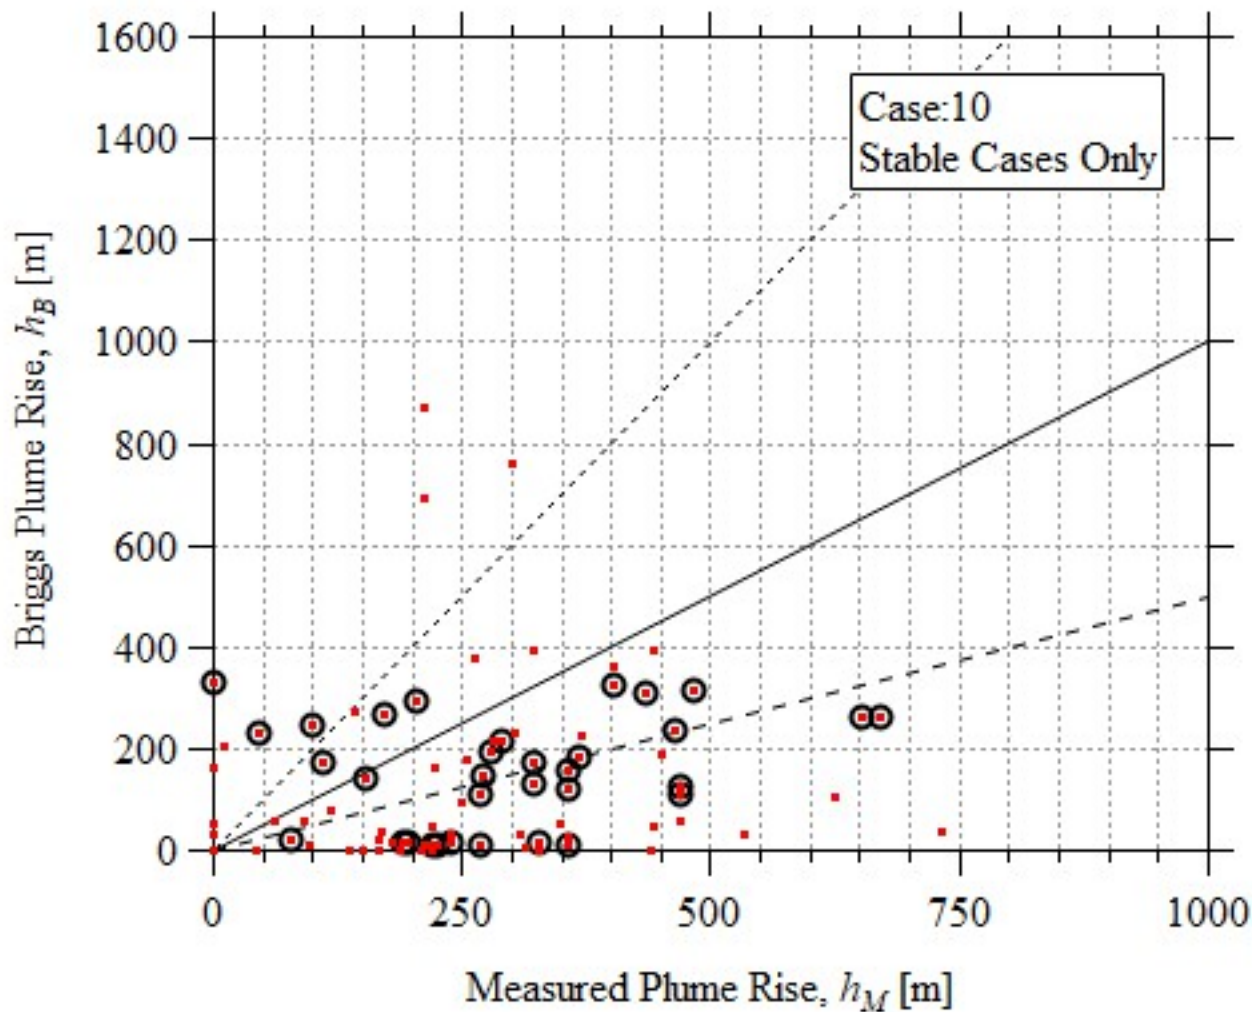

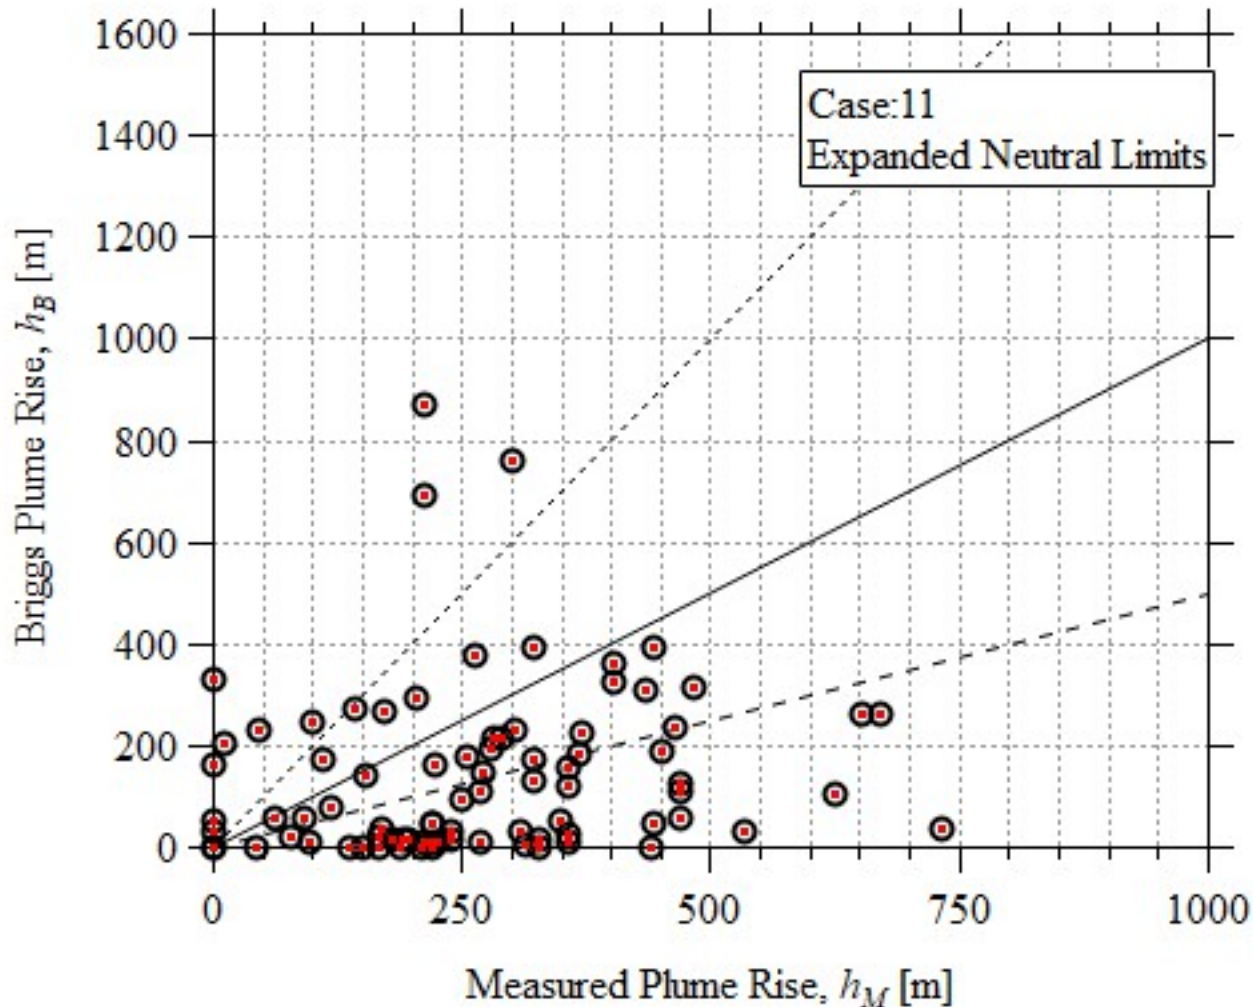



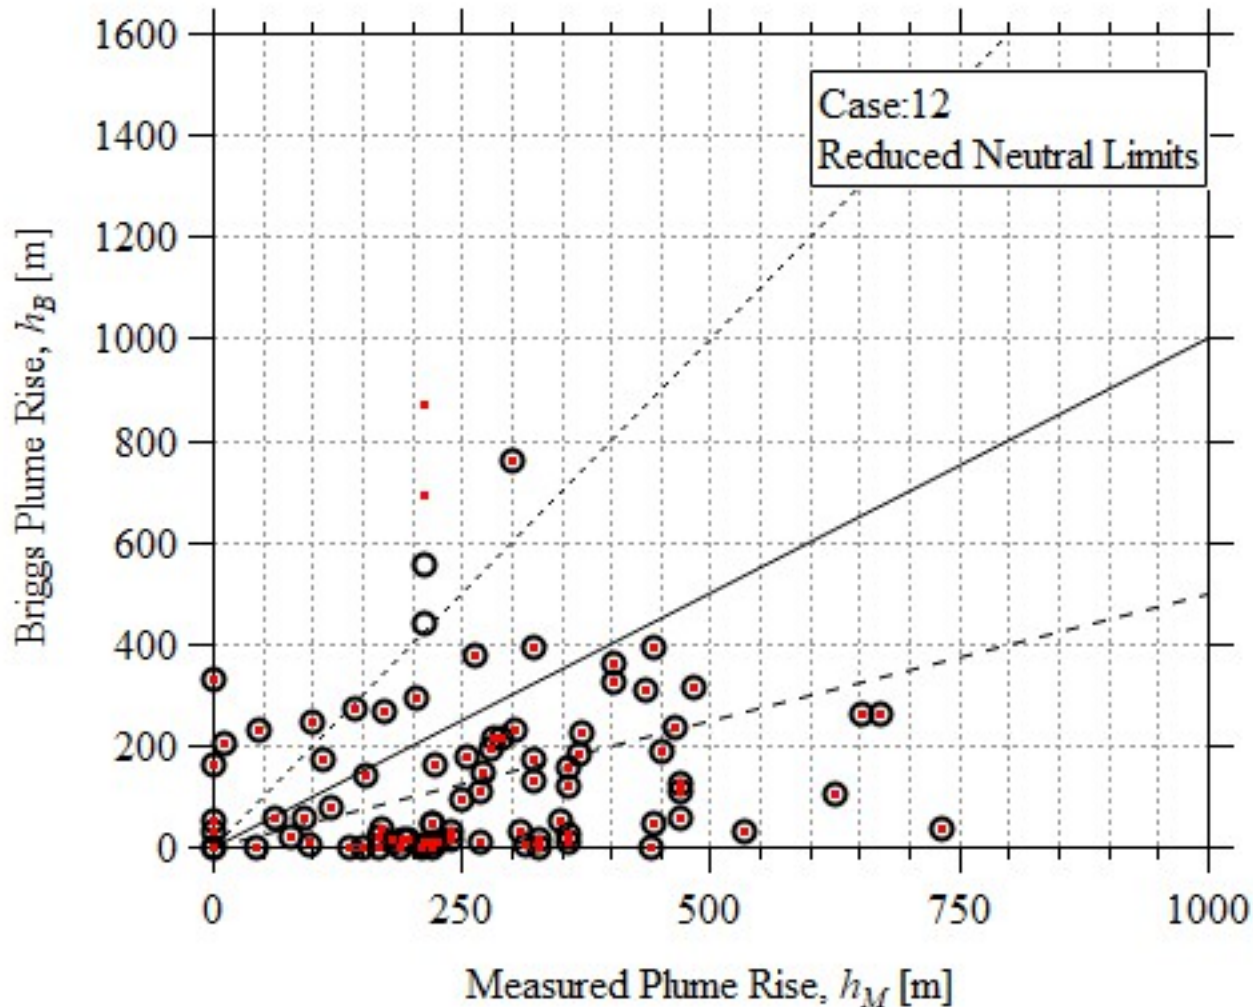



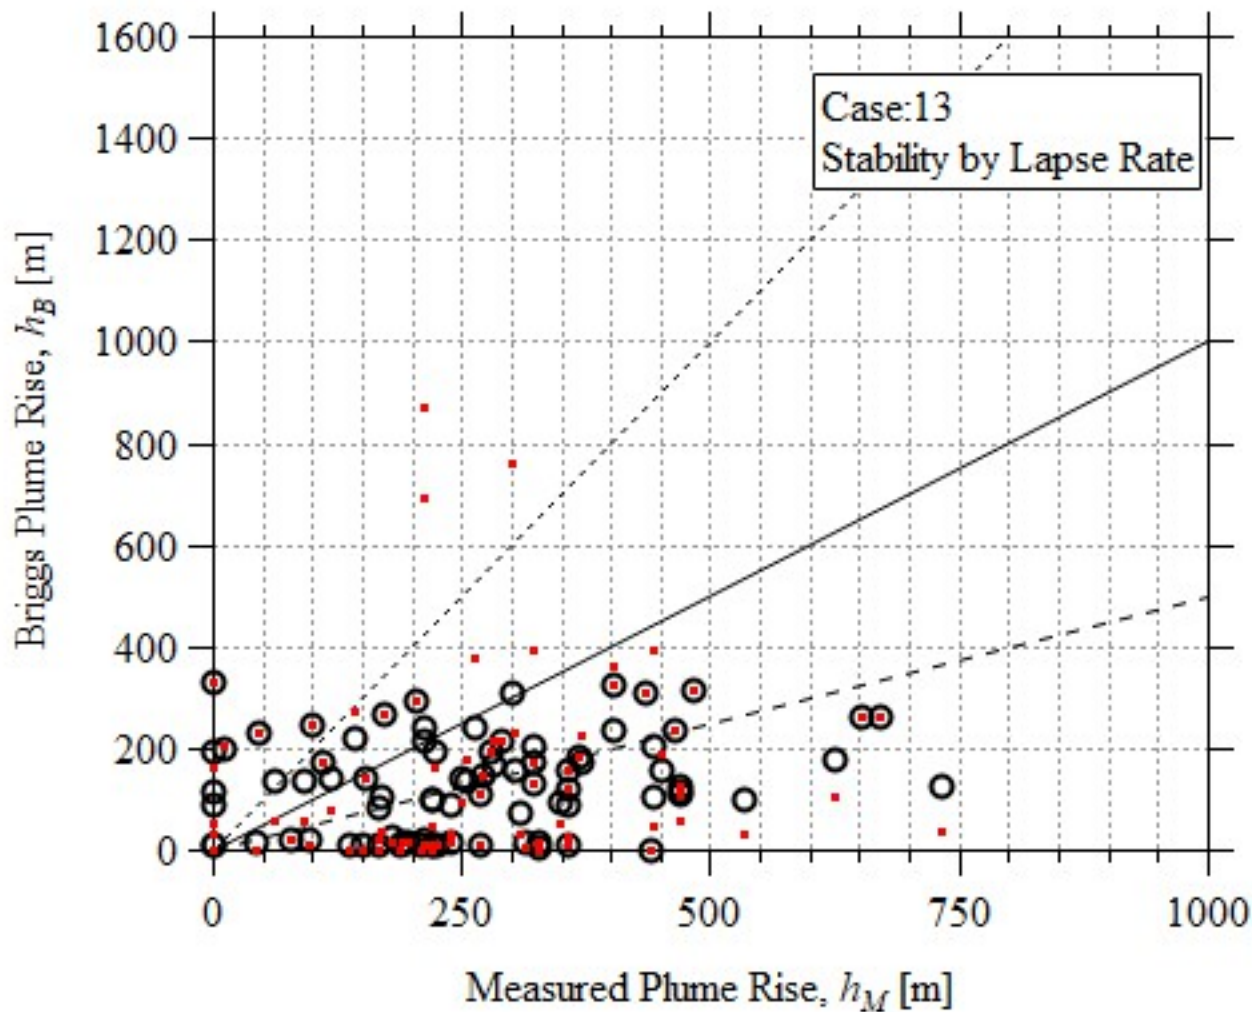

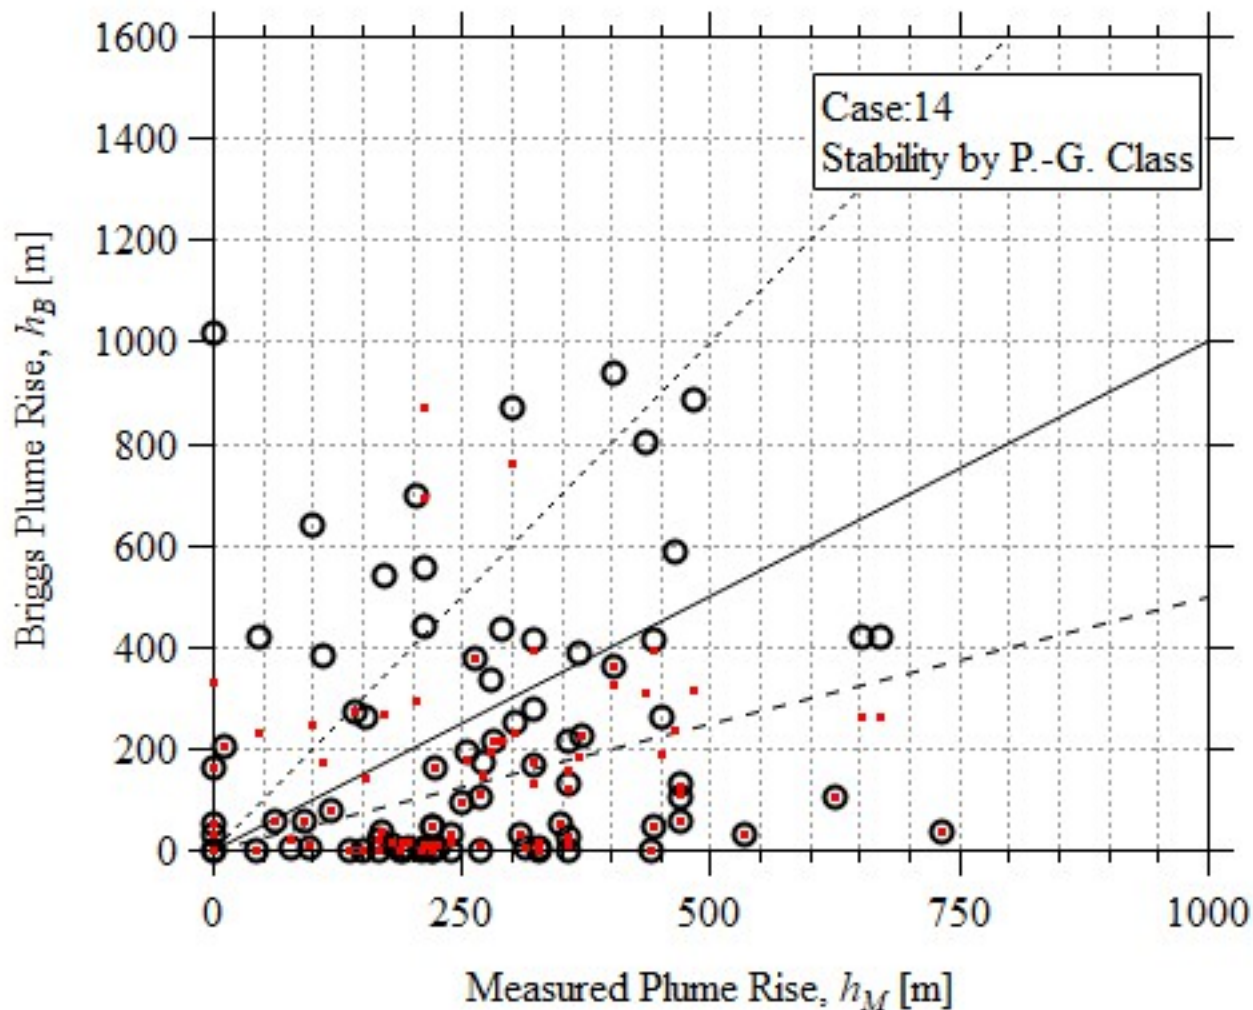

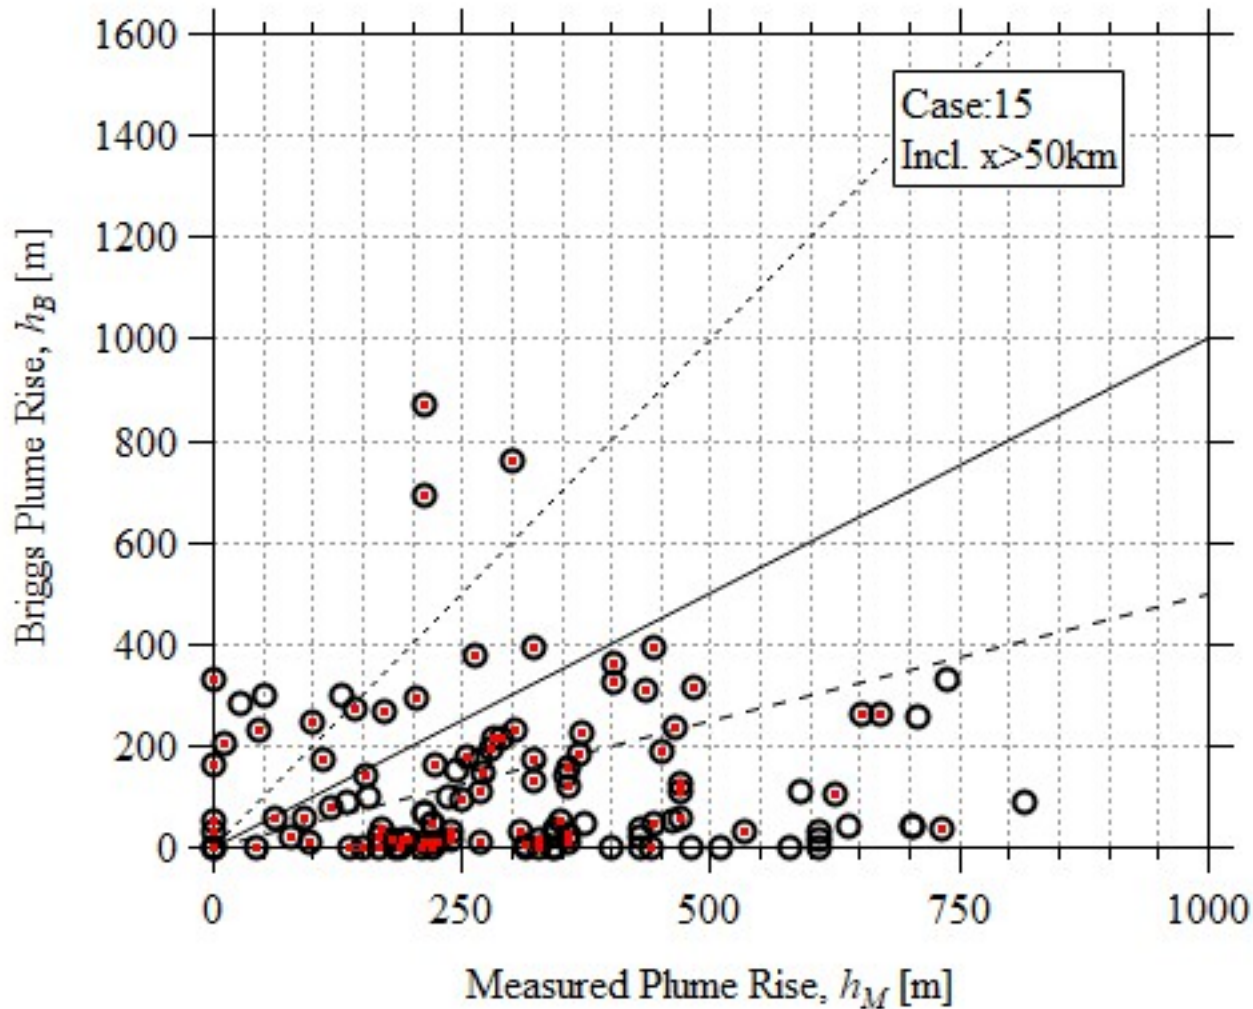

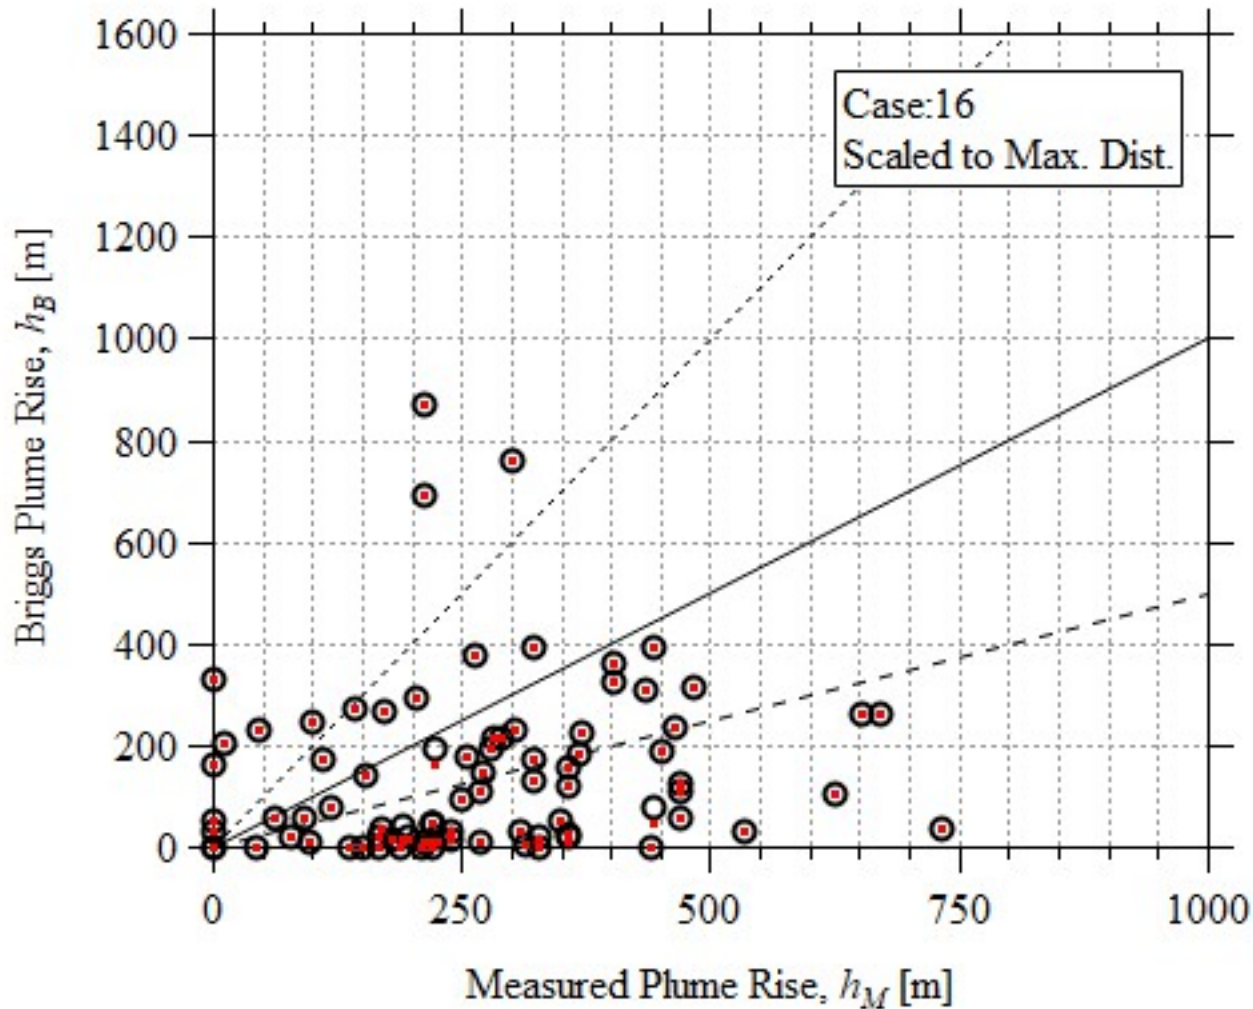

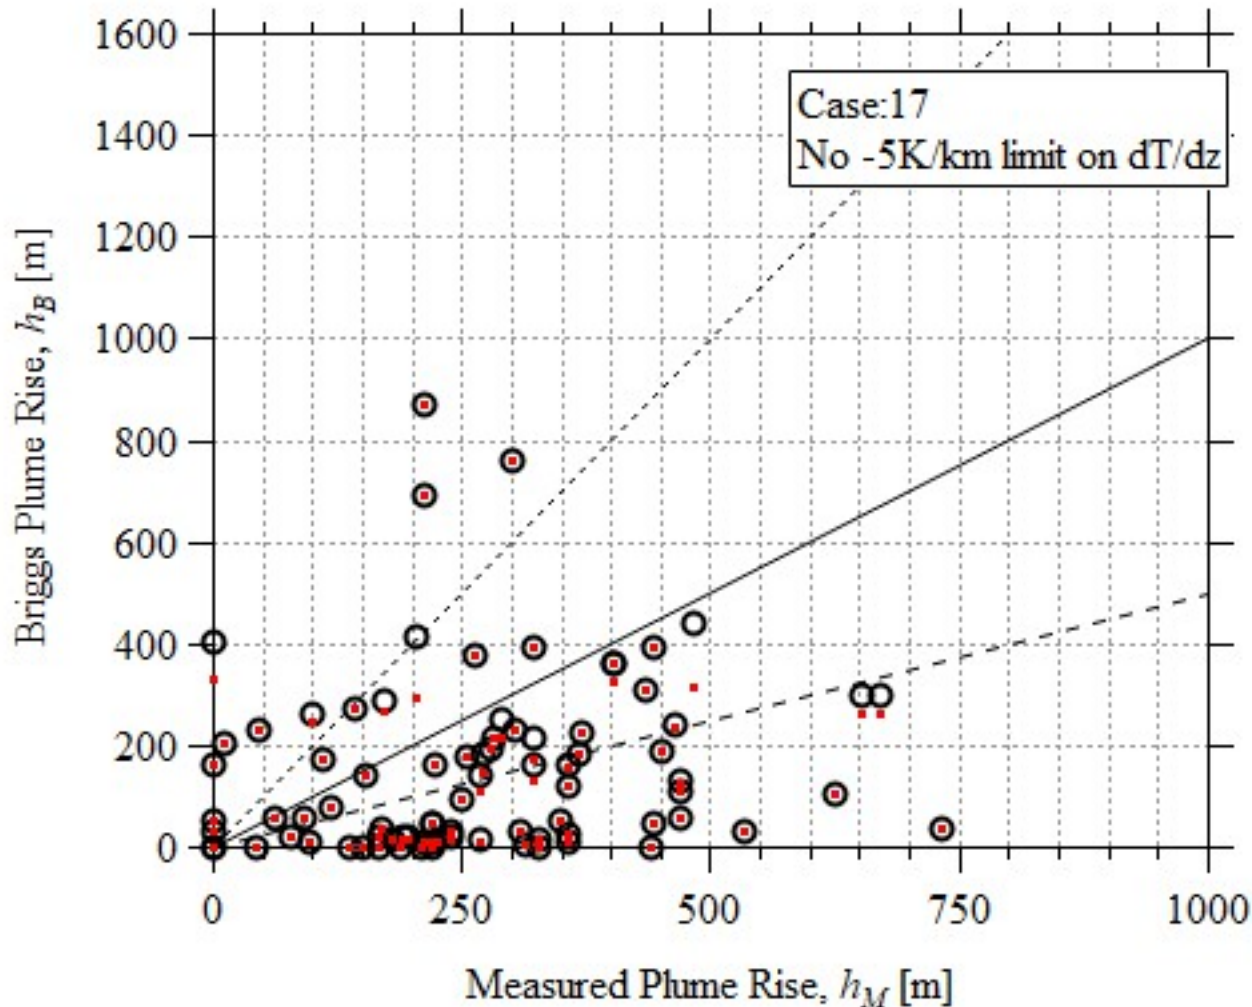



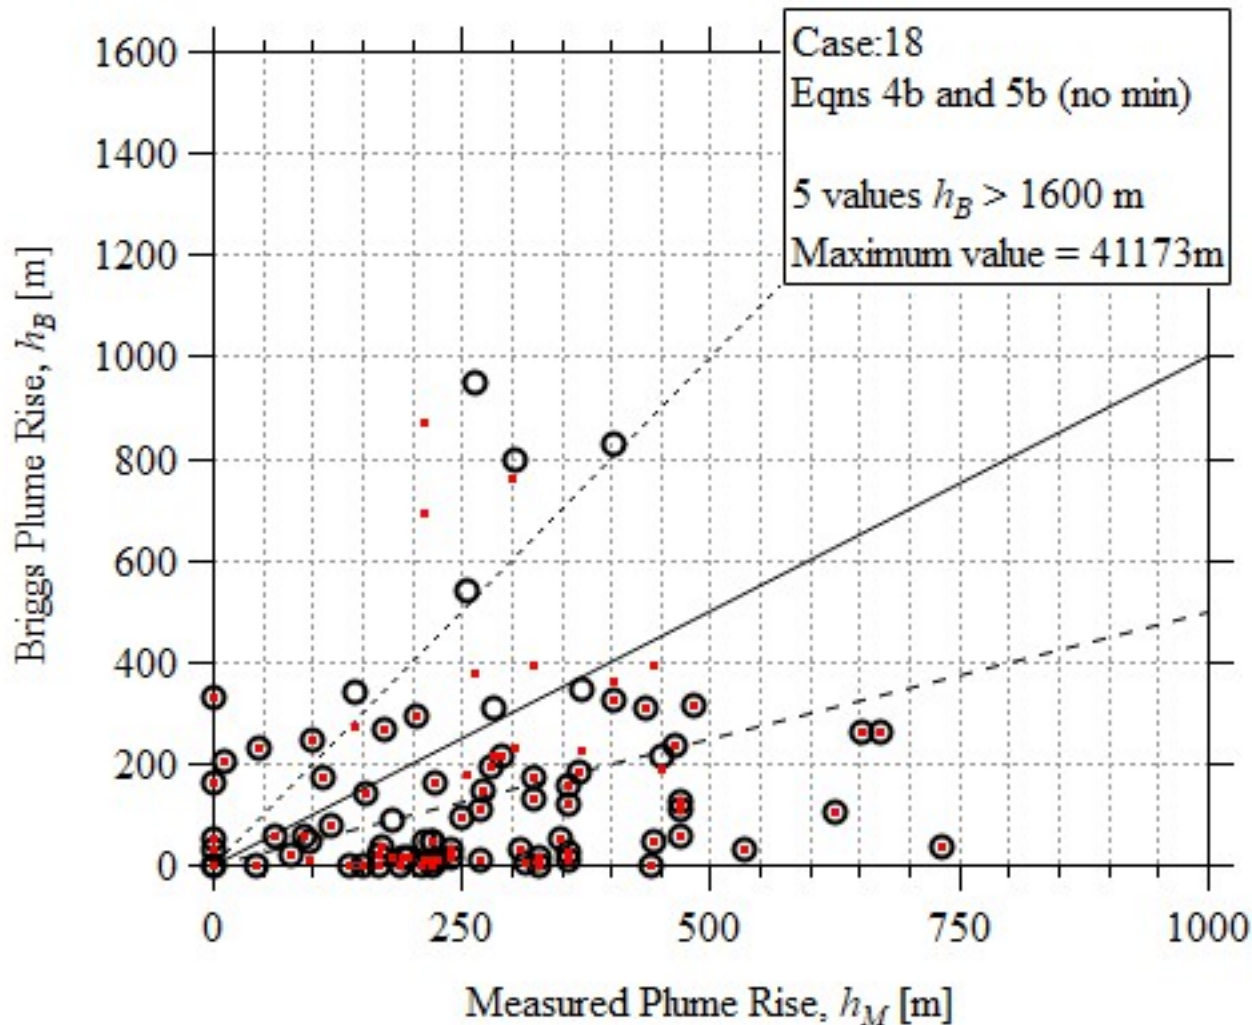

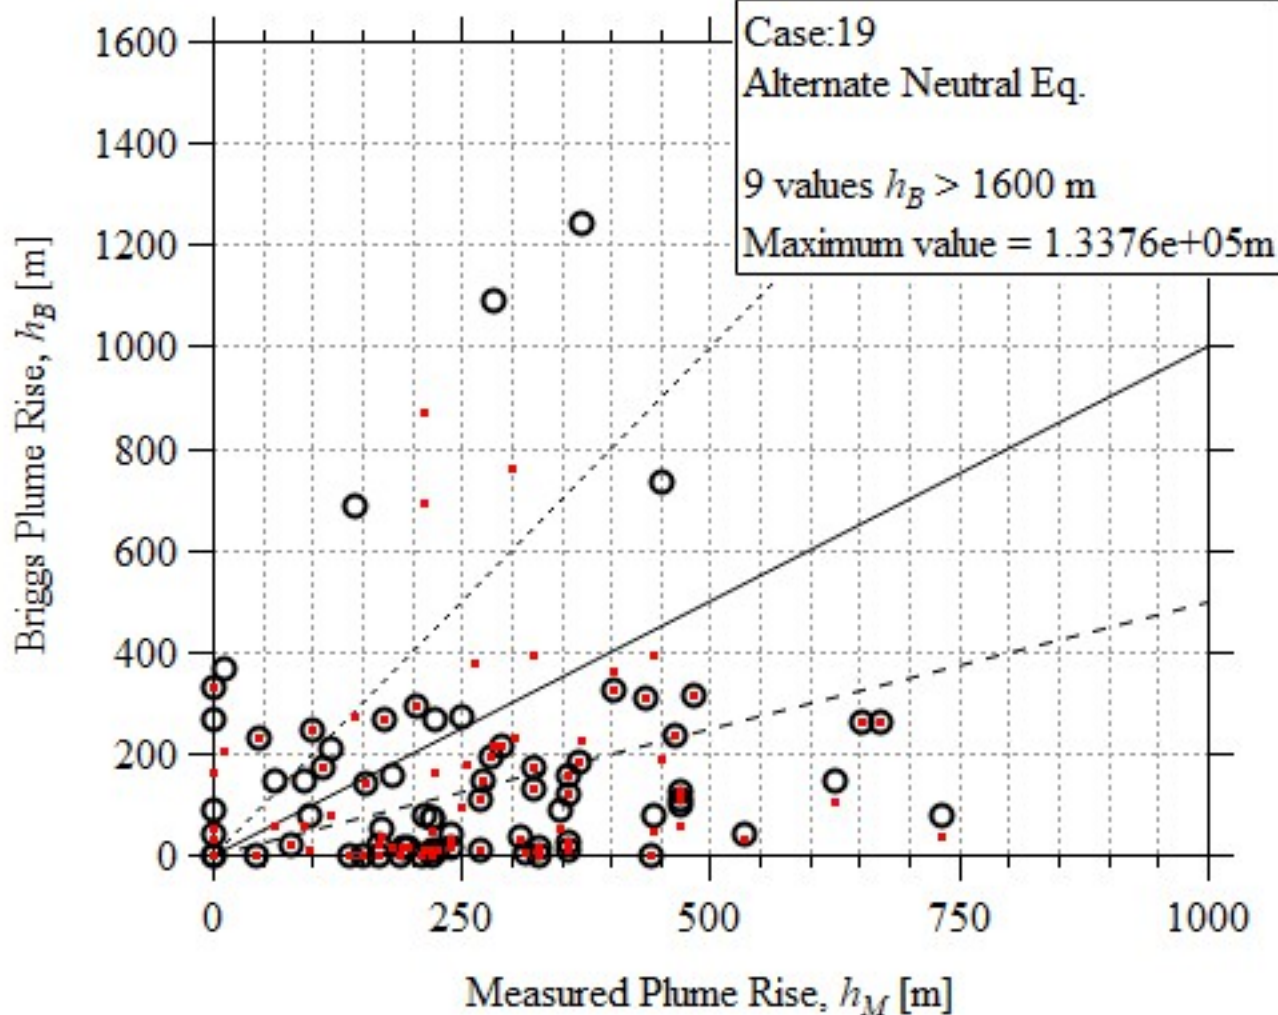



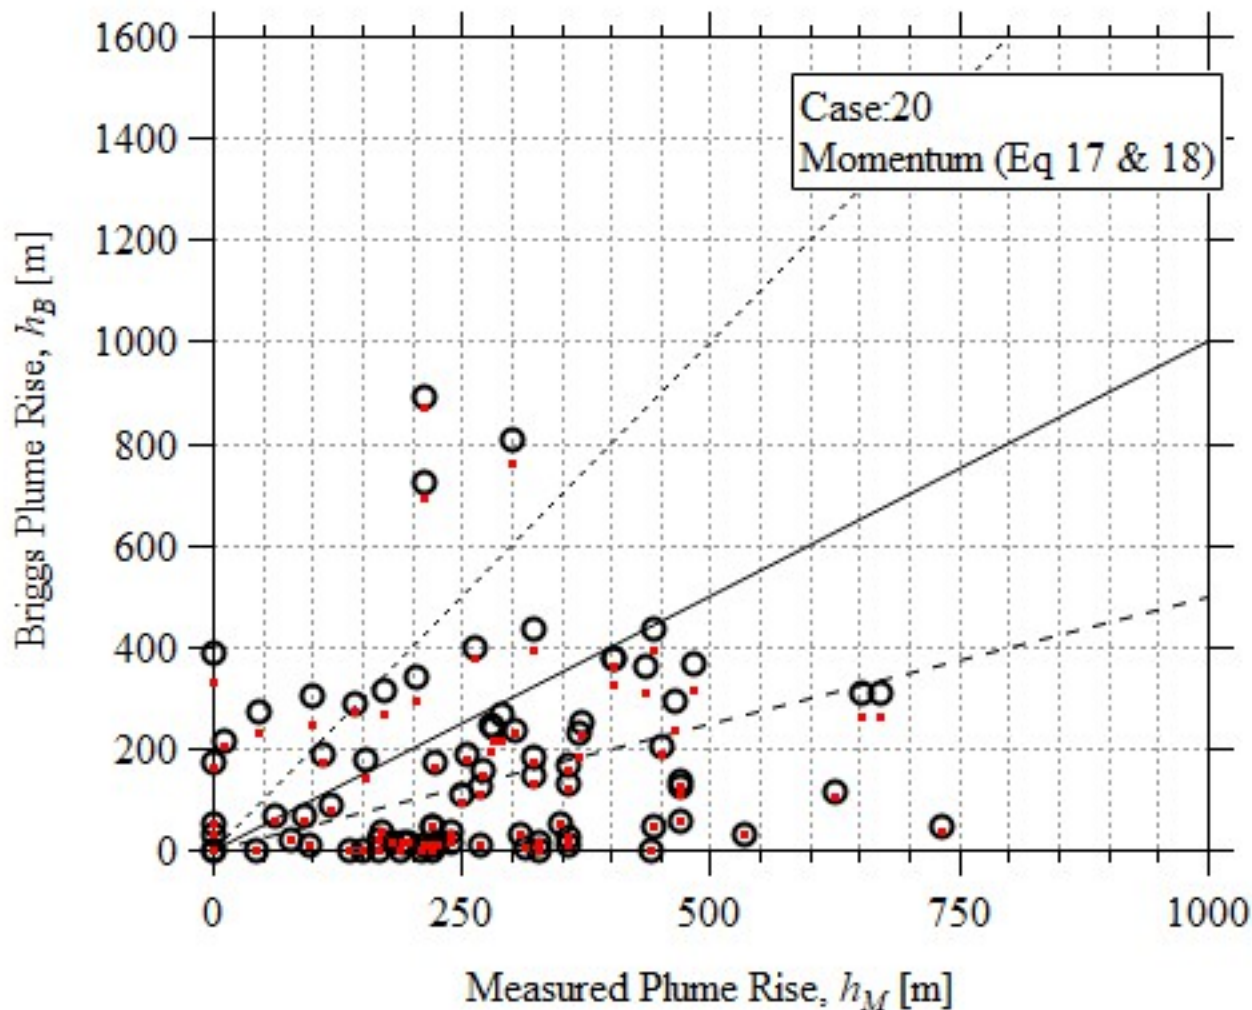

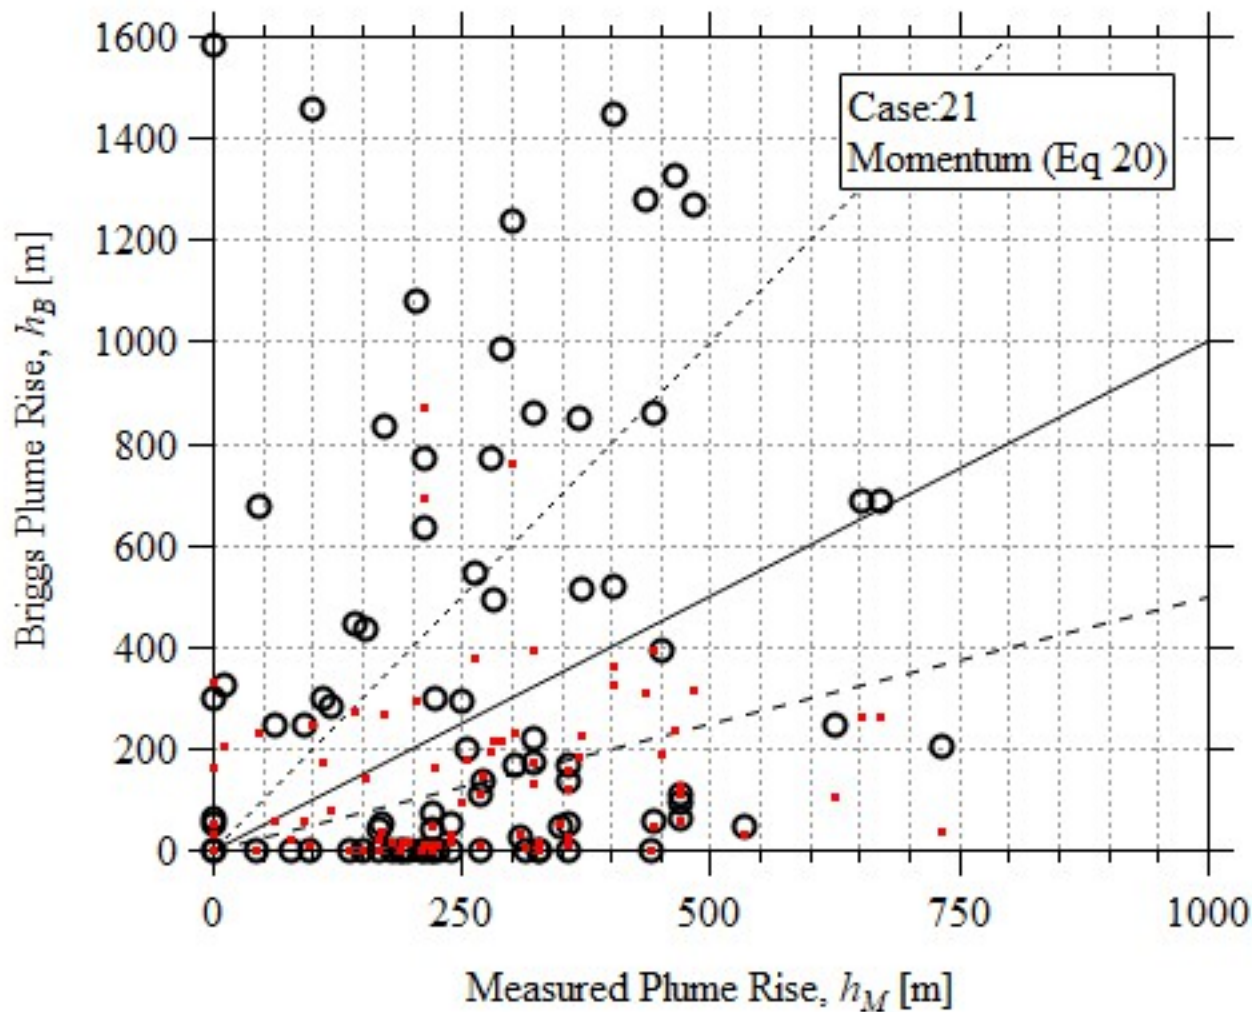

Supplement: Supplementary file 1 [file acp-18-14695-2018-supplement.pdf]
